# Supplementary material
Source: Research Square preprint supplement (doi:10.21203/rs.3.rs-9588176/v1)
Supplement: Supplementary file 1 [file 655020a01a94db3ac1f501c9.docx]

**SUPPLEMENTARY TABLE 1**

| **CHRONIC MIGRAINE** | | | | |
| --- | --- | --- | --- | --- |
| **Outcomes** | **M0**  **(184)** | **M3**  **(184)** | **M6**  **(145)** | **M12**  **(80)** |
| **R ≥50%, n (%)** | - | 66 (35.9) | 60 (41.4) | 43 (53.8) |
| **R ≥30%, n (%)** | - | 89 (48.4) | 78 (53.8) | 51 (63.8) |
| **R ≥75%, n (%)** | - | 19 (10.3) | 24 (16.6) | 24 (30.0) |
| **MHDs**  ***Change/M0*** | 23.5 ± 5.1 | 17.5 ± 9.1*  *6.0 ± 7.9* | 15.8 ± 9.5*  *7.7 ± 8.5* | 12.8 ± 9.0*  *10.1 ± 9.0* |
| **MMDs**  ***Change/M0*** | 21.4 ± 6.2 | 15.4 ± 9.1*  *6.0 ± 8.8* | 14.2 ± 9.3*  *6.9 ± 9.1* | 10.6 ± 8.8*  *9.8 ± 9.7* |
| **MATD**  ***Change/M0*** | 19.9 ± 8.0 | 14.2 ± 9.9*  *5.6 ± 8.6* | 12.9 ± 9.7*  *6.6 ± 9.5* | 10.7 ± 9.0*  *9.1 ± 9.9* |
| **HIT-6**  ***Change/M0*** | 67.2 ± 5.7 | 62.8 ± 8.3*  *4.4 ± 7.4* | 60.4 ± 9.7*  *6.8 ± 8.2* | 58.2 ± 9.5*  *8.3 ± 7.5* |
| **EQ-5Di**  ***Change/M0*** | 0.50 ± 0.30 | 0.6 ± 0.3*  *-0.1 ± 0.2* | 0.6 ± 0.3*  *-0.1 ± 0.2* | 0.7 ± 0.3*  *-0.2 ± 0.3* |
| **EQ-5Dvas**  ***Change/M0*** | 53.9 ± 19.2 | 59.4 ± 19.9*  *-5.2 ± 17.6* | 63.3 ± 20.8*  *-9.2 ± 19.7* | 68.8 ± 19.0  *-13.2 ± 18.7* |
| **MIBS-4**  ***Change/M0*** | 6.7 ± 4.0 | 5.7 ± 4.1*  *1.0 ± 3.4* | 4.8 ± 3.8*  *1.8 ± 3.3* | 4.5 ± 4.0*  *2.3 ± 4.4* |
| **HADS-A**  ***Change/M0*** | 9.7 ± 4.4 | 9.1 ± 4.3**  *0.7 ± 2.8* | 8.6 ± 4.4*  *1.1 ± 3.1* | 8.0 ± 3.9*  *1.3 ± 3.1* |
| **HADS-D**  ***Change/M0*** | 7.6 ± 4.8 | 7.4 ± 5.0  *0.2 ± 3.2* | 7.0 ± 4.8**  *0.6 ± 3.1* | 5.7 ± 4.3*  *1.8 ± 3.2* |
| **MO, n (%)** | 161 (87.5) | 96 (53.6)* | 68 (48.9)* | 31 (39.2)* |
| **EM, n (%)** | 0 (100) | 87 (47.3) | 77 (53.1) | 55 (68.8) |
| **HIGH FREQUENCY EPISODIC MIGRAINE** | | | | |
| **Outcome** | **M0**  **(118)** | **M3**  **(118)** | **M6**  **(101)** | **M12**  **(58)** |
| **R ≥50%, n (%)** | - | 41 (34.7) | 36 (35.6) | 20 (34.5) |
| **R ≥30%, n (%)** | - | 58 (49.2) | 60 (59.4) | 36 (62.1) |
| **R ≥75%, n (%)** | - | 14 (11.9) | 14 (13.9) | 8 (13.8) |
| **MHDs**  ***Change/M0*** | 10.8 ± 3.3 | 8.9 ± 6.3*  2.0 ± 6.8 | 8.0 ± 5.5*  2.7 ± 6.0 | 8.1 ± 5.3*  2.9 ± 4.8 |
| **MATD**  ***Change/M0*** | 10.4 ± 3.9 | 7.6 ± 5.9*  2.8 ± 6.6 | 7.1 ± 5.5*  3.3 ± 5.8 | 6.9 ± 4.6*  3.8 ± 4.3 |
| **HIT-6**  ***Change/M0*** | 66.6 ± 7.5 | 61.1 ± 8.3*  5.5 ± 9.6 | 59.4 ± 8.5*  7.2 ± 10.1 | 58.5 ± 7.9*  7.2 ± 9.3 |
| **EQ-5Di**  ***Change/M0*** | 0.64 ± 0.25 | 0.7 ± 0.3**  0.0 ± 0.2 | 0.7 ± 0.3**  -0.1 ± 0.2 | 0.7 ± 0.2**  -0.1 ± 0.2 |
| **EQ-5Dvas *Change/M0*** | 59.3 ± 17.4 | 66.7 ± 15.2*  -7.3 ± 16.3 | 69.5 ± 15.5*  -8.9 ± 17.2 | 70.3 ± 14.4*  -12.0 ± 16.0 |
| **MIBS-4**  ***Change/M0*** | 5.7 ± 4.0 | 4.5 ± 3.7*  1.2 ± 3.7 | 4.4 ± 4.0*  1.2 ± 3.3 | 4.1 ± 3.6*  1.4 ± 3.1 |
| **HADS-A**  ***Change/M0*** | 10.4 ± 4.4 | 9.4 ± 4.1*  1.0 ± 3.0 | 9.0 ± 4.2*  1.2 ± 3.7 | 8.3 ± 3.8*  2.0 ± 3.8 |
| **HADS-D**  ***Change/M0*** | 6.9 ± 4.1 | 5.9 ± 3.8*  1.1 ± 3.1 | 5.8 ± 4.2*  1.2 ± 3.8 | 5.2 ± 3.5*  2.1 ± 3.8 |
| **MO, n (%)** | 68 (57.6) | 28 (23.9)* | 19 (19.0)* | 12 (21.1)* |

**Supplementary Table 1 (ST1). Longitudinal evolution of diary-based outcomes according to migraine subtype at baseline**: monthly headache days (MHDs), monthly migraine days (MMDs), and monthly acute treatment days (MATD) in patients with chronic migraine and high frequency episodic migraine at baseline. Data are presented as mean±SD or n(%) as appropriate. *Wilcoxon signed-rank test vs M0: p < 0.001; **Wilconson signed rank test vs M0: p<0.05. Change/M0, change from baseline; EM, episodic migraine; EQ-5Di, EuroQol 5-Dimension index; EQ-5Dvas, EuroQol 5-Dimension index; HADS-A, Hospital Anxiety and Depression Scale-Anxiety; HADS-D, Hospital Anxiety and Depression Scale-Depression; HIT-6, Headache Impact Test-6; MATD, monthly acute treatment days; MHDs, monthly headache days; MIBS-4, Migraine Interictal Burden Scale-4; MMDs, monthly migraine days; MO, medication overuse; R, response; VAS, visual analogue scale.

**SUPPLEMENTARY TABLE 2**

| **OVERALL POPULATION (n=302)** | | | | |
| --- | --- | --- | --- | --- |
| **Outcome** | **M0** | **M3** | **M6** | **M12** |
| **R ≥50%, n (%)** | - | 107 (35.4) | 109 (36.1) | 111 (36.8) |
| **R ≥30%, n (%)** | - | 147 (48.7) | 162 (53.6) | 158 (52.3) |
| **R ≥75%, n (%)** | - | 33 (10.9) | 43 (14.2) | 50 (16.6) |
| **MHDs** | 18.6 ± 7.7 | 14.1 ± 9.1* | 13.3 ± 9.1* | 13.5 ± 9.3* |
| **MMDs** | 17.0 ± 7.6 | 12.5 ± 8.7* | 12.1 ± 8.9* | 12.0 ± 9.1* |
| **MATD** | 16.2 ± 8.1 | 11.8 ± 9.2* | 11.5 ± 9.1* | 11.2 ± 9.2* |
| **CHRONIC MIGRAINE (n=184)** | | | | |
| **Outcome** | **M0** | **M3** | **M6** | **M12** |
| **R ≥50%, n (%)** | - | 66 (35.9) | 70 (38.0) | 72 (39.1) |
| **R ≥30%, n (%)** | - | 89 (48.4) | 95 (51.6) | 91 (49.5) |
| **R ≥75%, n (%)** | - | 19 (10.3) | 28 (15.2) | 36 (19.6) |
| **MHDs** | 23.5 ± 5.1 | 17.5 ± 9.1* | 16.4 ± 9.4* | 16.5 ± 9.7* |
| **MMDs** | 21.4 ± 6.2 | 15.4 ± 9.1* | 14.8 ± 9.5* | 14.5 ± 9.8* |
| **MATD** | 19.9 ± 8.0 | 14.5 ± 9.8* | 13.9 ± 9.9* | 13.4 ± 10.0* |
| **HIGH FREQUENCY EPISODIC MIGRAINE** | | | | |
| **Outcome** | **M0** | **M3** | **M6** | **M12** |
| **R ≥50%, n (%)** | - | 41 (34.7) | 39 (33.1) | 39 (33.1) |
| **R ≥30%, n (%)** | - | 58 (49.2) | 67 (56.8) | 67 (56.8) |
| **R ≥75%, n (%)** | - | 14 (11.9) | 15 (12.7) | 14 (11.9) |
| **MHDs** | 10.8 ± 3.3 | 8.9 ± 6.3* | 8.5 ± 6.0* | 8.8 ± 6.0* |
| **MMDs** | 10.0 ± 3.0 | 8.0 ± 5.8* | 7.8 ± 5.9* | 8.0 ± 5.9* |
| **MATD** | 10.4 ± 3.9 | 7.6 ± 5.9* | 7.7 ± 5.6* | 7.7 ± 5.6* |

**Supplementary Table 2 (ST2). LOCF sensitivity analysis in the overall population and according to migraine subtype at baseline.** Data are presented as mean ± SD or n (%), as appropriate. *Wilcoxon signed-rank test vs M0: p < 0.001. LOCF, last observation carried forward; MATD, monthly acute treatment days; MHDs, monthly headache days; MMDs, monthly migraine days; R, response.

**
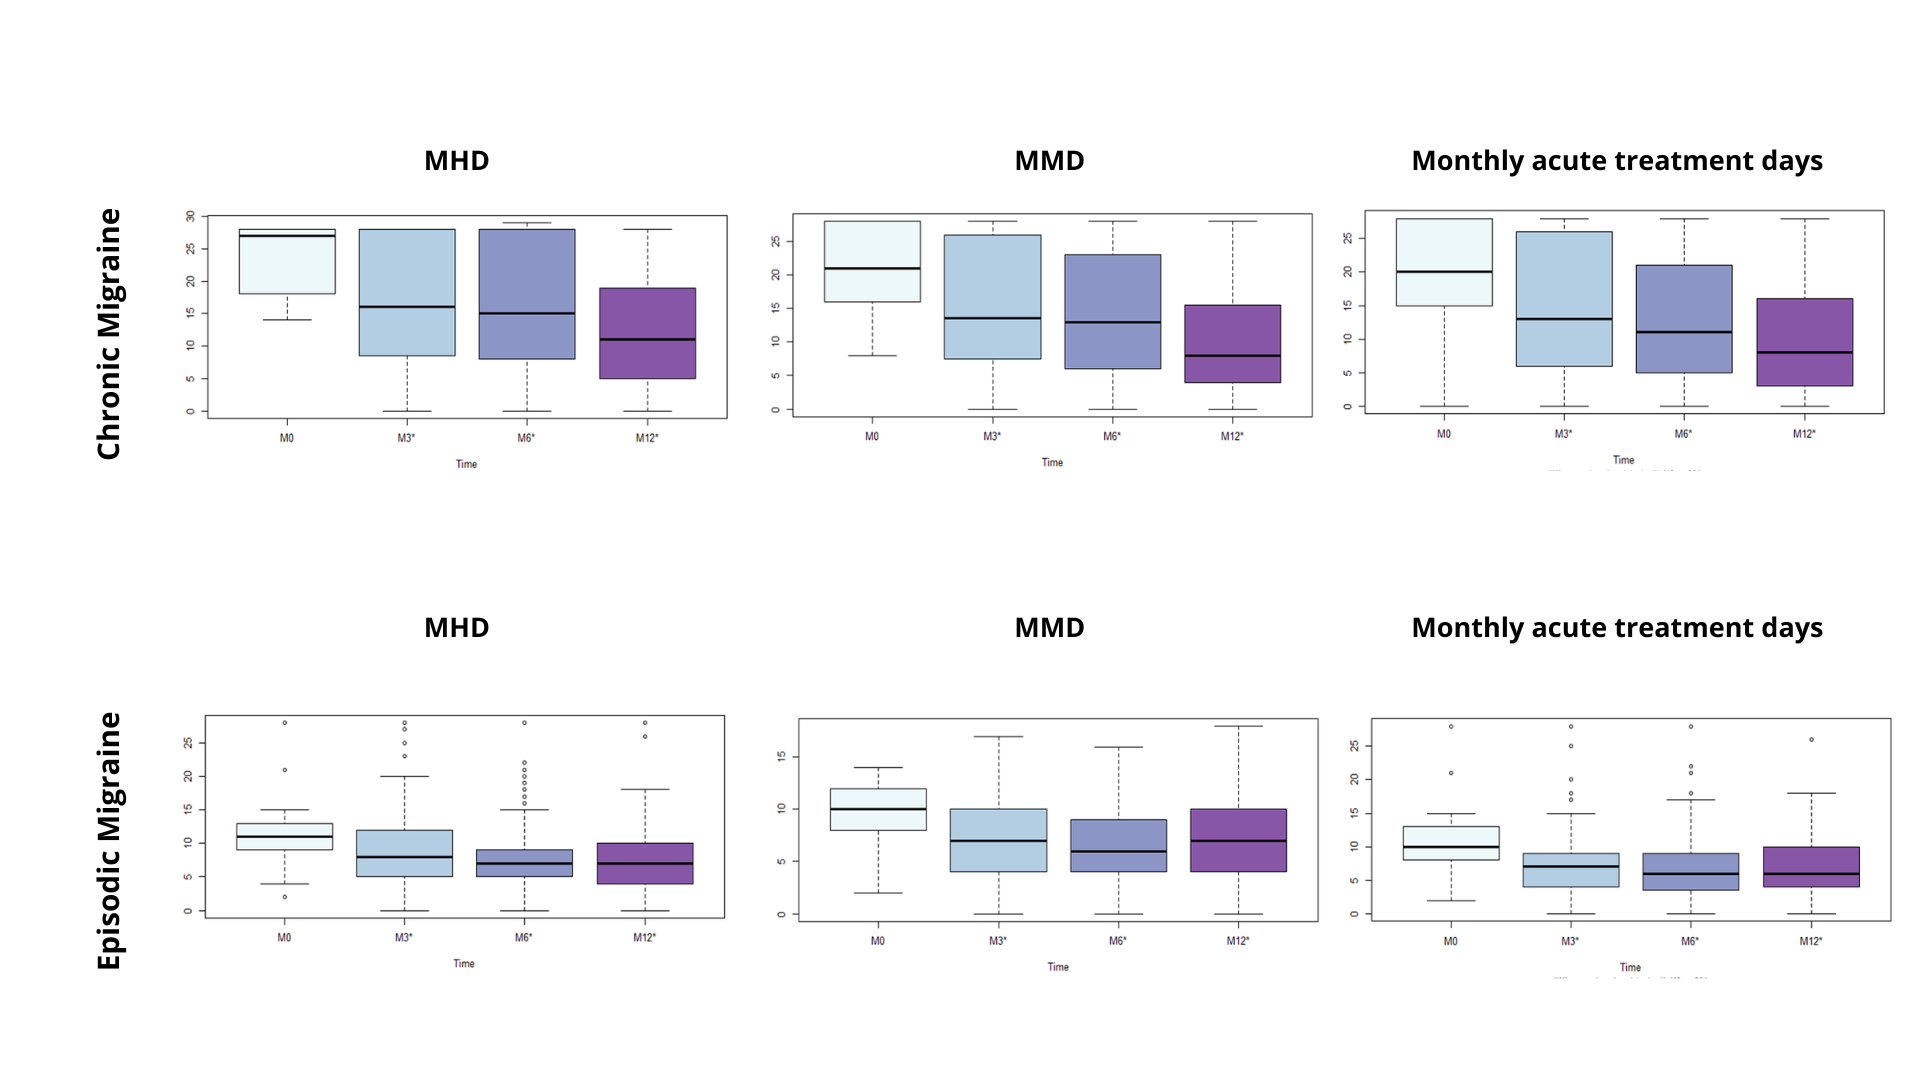
SUPPLEMENTARY FIGURE 1**

**Supplementary Figure 1 (SF1).** **Longitudinal evolution of diary-based outcomes according to migraine subtype at baseline**. ***Wilcoxon signed-rank test vs M0: p < 0.001*.* MHDs, monthly headache days; MMDs, monthly migraine days.
